# Supplementary material for: A systematic search for new mammalian noncoding RNAs indicates little conserved intergenic transcription
Source: PubMed Central journal article supplement (PMC1199595; doi:10.1186/1471-2164-6-104), 2005-08-05
Supplement: 1471-2164-6-104-S5.pdf [file 1471-2164-6-104-S5.pdf]

**Transcript ID**

TB2921a  
TB1142b.RT  
TB4119a.RT  
TB4424b.RT  
TB2336c.RT  
TB4299a  
TB337a.RT  
TB3942c.RT  
TB1561b.RT

**mouse probes**

CATCTCTGTGGTCCTCCTGCCTTCT  
CAATAAATGGCTCCCGCGTGCTTCATTAA  
TCCTGGTGGTGTCTGTGTAACCATGATAAC  
TCTGGAATCCATCCTTGCCTCTGTCC  
CCTCCTGCTTTTCTGCCTTCTCAAC  
GTTACCCTTCCCACCAGTCTCCCTAA  
GCCCTGCTCTCCCTTCAGTAAGTTTAC  
GTGAAGTGATGCATGCAAAGGAGGCAG  
GCCCATCTGTCTCTTACCTCCTTG

**human probes**

CACATTCTGTGGTCCTCCTGCCTTCT  
CAATAAATGGCTCCCATGAGCTTCATTAA  
TCCTGATGGTGTCTGTGTAACCATGATAAC  
TCTGGAATCCATCCTTGTCTCTGTCC  
CCTCCCGCCTTCTGCCTCCTTAGC  
CTTACCCTTCCCACCAGTCTCCCTAA  
GCCCTGCACTCCCTTCAGTAAG  
CTGCCTTCTTTACATGCATGGCTTCAC  
CCCCATCTGTCTCTTACCTCCTTA

**Positive controls**

U4 CCTCGGATAAACCTCATTGGCTA  
U5 CTCTCCACGGAAATCTTTAGTAAAAGG  
Gly-tRNA GAATTCTACCACTGAACCACCAATGC  
7SK ACCTTGAGAGCTTGTTTGGAGGTTCTAGCAGGGGAGCGCAGCTACTCGTA
